# Supplementary material for: Amperometric Sensing of Carbon Monoxide: Improved Sensitivity and Selectivity via Nanostructure-Controlled Electrodeposition of Gold
Source: MDPI journal article supplement (doi:10.3390/bios11090334), 2021-09-13
Supplement: s1 [file s1]

# Amperometric Sensing of Carbon Monoxide: Improved Sensitivity and Selectivity via Nanostructure-Controlled Electrodeposition of Gold

Taehui Kwon <sup>†</sup>, Hee Young Mun <sup>†</sup>, Sunghwa Seo <sup>†</sup>, Areum Yu, Chongmok Lee and Youngmi Lee\*

Department of Chemistry & Nanoscience, Ewha Womans University, Seoul 03760, Korea

<sup>†</sup>Authors contribute this work equally.

\* Correspondence:

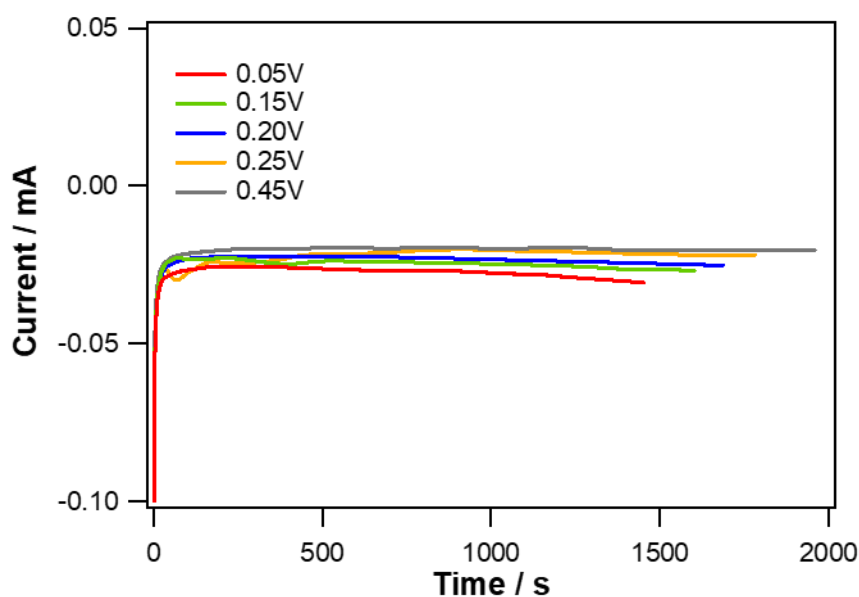

**Figure S1.** Potentiostatic electrodeposition curves of the Au electrodes at various deposition potentials (0.05 V to 0.45 V).

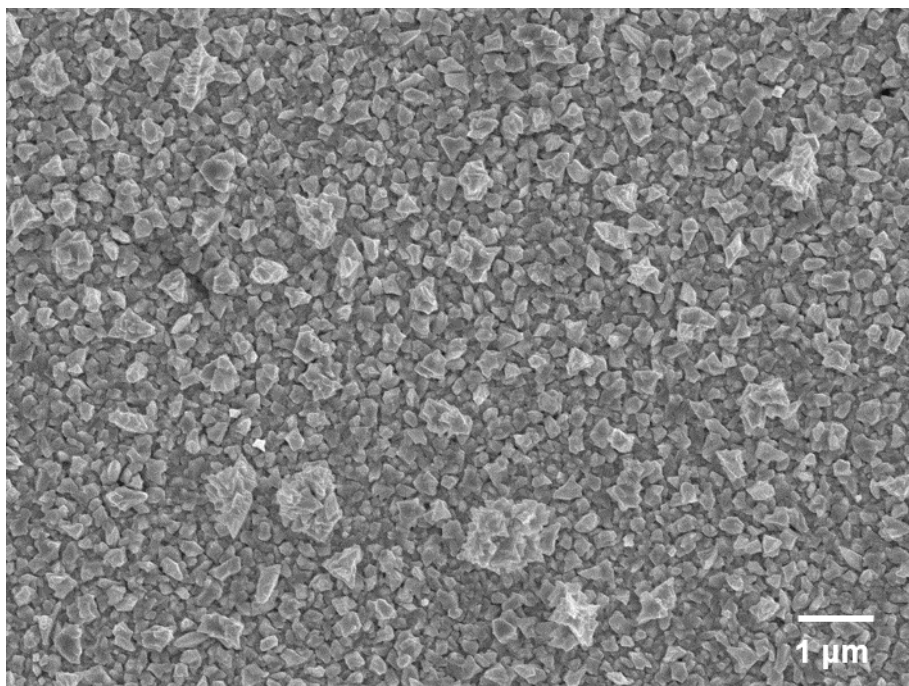

**Figure S2.** SEM image of the Au nanostructure electrodeposited at 0.05 V using a precursor solution containing 7 mM  $\text{HAuCl}_4$  aqueous solution without  $\text{Pb}(\text{CH}_3\text{COO})_2$ .

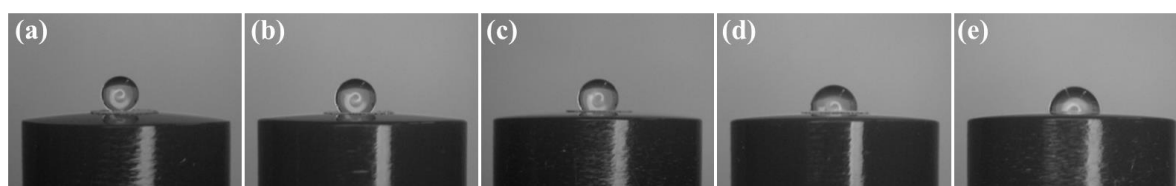

**Figure S3.** Water droplets (1  $\mu\text{L}$ ) on the Au surfaces deposited with deposition potentials of (a) 0.05 V, (b) 0.15 V, (c) 0.20 V, (d) 0.25 V, and (e) 0.45 V.

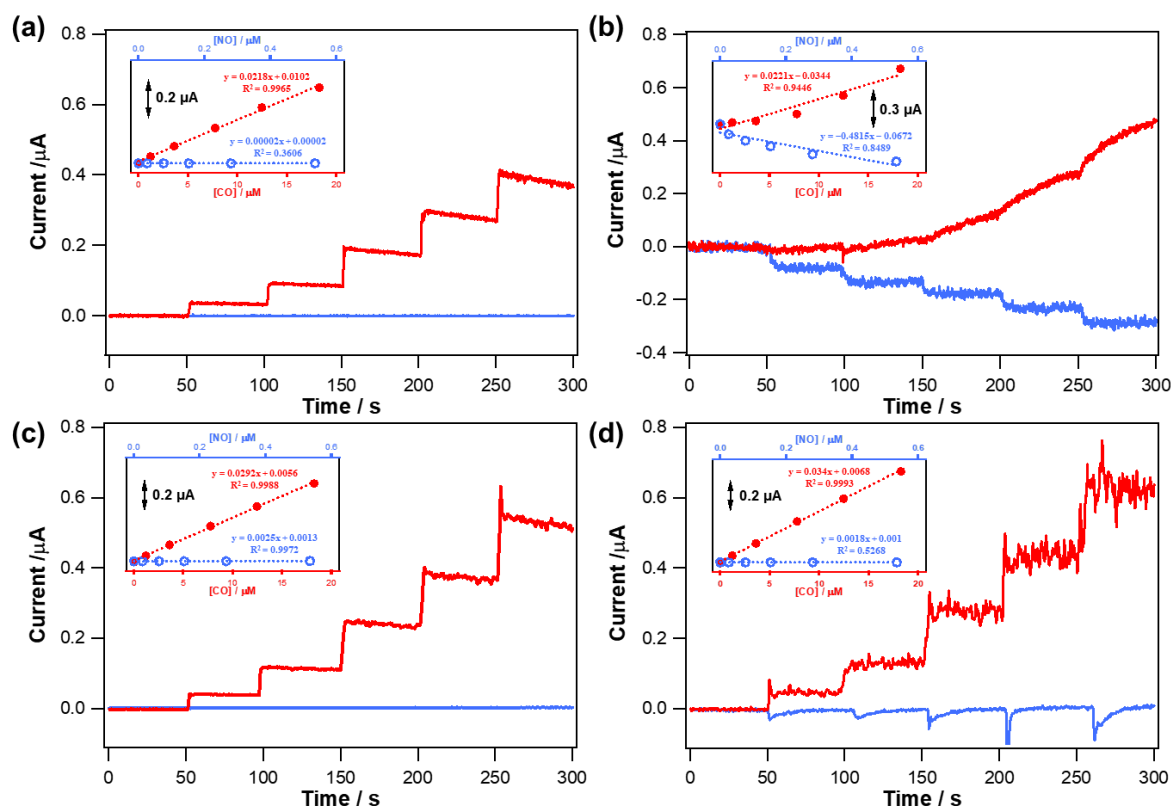

**Figure S4.** Dynamic current response curves of (a,c) Au and (b,d) Pt deposited electrodes to the concentration changes of CO (red line) and NO (blue line) in deaerated PBS solution (pH 7.4).  $E_{app}$  = (a,b)  $-0.05$  V and (c,d)  $+0.4$  V vs Ag/AgCl. Insets show the corresponding calibration curves (red filled circle, CO; blue open circle, NO). The concentration was increased upto  $18.2 \mu\text{M}$  and  $0.53 \mu\text{M}$  for CO and NO, respectively.

**Table S1.** Selectivity coefficients ( $\log K_{CO,x}^{amp}$ ) of the Au and Pt electrodes for CO over typical biological interferences (x).

| x               | Electrode  |            |
|-----------------|------------|------------|
|                 | Au deposit | Pt deposit |
| AA              | -0.714     | -0.405     |
| AP              | -3.944     | -0.106     |
| GABA            | -3.768     | -0.122     |
| $\text{NO}_2^-$ | -3.665     | 0.336      |
